# Supplementary material for: Efficient Formulations and Decomposition Approaches for Power Peak Reduction in Railway Traffic via Timetabling
Source: Atypon-hosted journal article supplement (doi:10.1287/trsc.2020.1021), 2021-02-23
Supplement: trsc.2020.1021.sm1.pdf [file trsc.2020.1021.sm1.pdf]

# Appendix to: Efficient Formulations and Decomposition Approaches for Power Peak Reduction in Railway Traffic via Timetabling

Andreas Bäermann<sup>1</sup>, Alexander Martin<sup>1</sup> and Oskar Schneider<sup>2</sup>

<sup>1</sup> `Andreas.Baermann@fau.de`

`Alexander.Martin@fau.de`

Lehrstuhl für Wirtschaftsmathematik,

Department Mathematik,

Friedrich-Alexander-Universität Erlangen-Nürnberg,

Cauerstraße 11, 91058 Erlangen, Germany

<sup>2</sup> `Oskar.Schneider@fau.de`

Gruppe Optimization

Fraunhofer Arbeitsgruppe für Supply Chain Services SCS,

Fraunhofer-Institut für Integrierte Schaltungen IIS,

Nordostpark 93, 90411 Nürnberg, Germany

## A Further Computational Statistics

In this appendix, we give some further computational statistics on the solution process of our models and algorithms as well as results for varying the upper bound on instantaneous peak consumption in Problem (TTMAPI).

Tables 1 and 2 detail the computational behaviour of formulations NA, TU and DF for Problem (TTMAPBR), distinguishable by Column *Form.*. Column *BB* shows the number of branch-of-bounds nodes solved while Column *Root-IP gap* shows the gap between the value of the root LP relaxation and the best integer solution found within a time limit of 10 minutes in per cent. Column *Next sol.* shows the time which passed until Gurobi finds a solution improving upon the initial timetable, which was passed to Gurobi as the first incumbent. Column *Next sav.* then shows the savings achieved with this improved solution, and, finally, Column *Best sav.* shows the best savings achieved by the best solution found within 10 minutes.

We see that the gap between the LP relaxation and the best solution found within 10 minutes by the two totally unimodular formulations TU and DF is always smaller than the produced by NA. On several of the regional and national instances, (*Regio Nordost*, *Regio Südost*, *Regio BW*, *S-Bahn Hamburg* and *Deutschland*), a significant gap remains when using formulation NA, whereas TU and DF close the gap (almost) completely. Furthermore, it becomes apparent the next better found solution for all formulations already brings large savings in most cases and is almost always already close to the savings in the optimal solution. However, we see that the totally unimodular formulations generally produce these improved solutions much faster in comparison to NA, with DF being far superior. The same holds for the number of solved branch-and-bound nodes. Note that the sparsity of DF gives it an additional edge in both respects, as Gurobi's heuristics take less time to execute and the LP relaxations can be solved much faster. In summary, these statistics explain very well why DF performed best in our computations.

| Instance             | Form. | #BB    | Root-IP gap [%] | Next sol. [s] | Next sav. [%] | Best sav. [%] |
|----------------------|-------|--------|-----------------|---------------|---------------|---------------|
| Zeil                 | NA    | 1,297  | 0.33            | 0             | 7.57          | 14.89         |
| Zeil                 | TU    | 19     | 0.32            | 0             | 6.80          | 14.89         |
| Zeil                 | DF    | 14     | 0.32            | 0             | 11.04         | 14.89         |
| Bayreuth Hbf         | NA    | 1      | 0.65            | 0             | 18.24         | 22.18         |
| Bayreuth Hbf         | TU    | 31     | 0.65            | 0             | 18.99         | 22.18         |
| Bayreuth Hbf         | DF    | 1      | 0.65            | 0             | 19.71         | 22.18         |
| Passau               | NA    | 40,638 | 1.57            | 0             | 6.54          | 14.48         |
| Passau               | TU    | 65,317 | 0.30            | 0             | 10.95         | 14.48         |
| Passau               | DF    | 4,806  | 0.30            | 0             | 11.82         | 14.48         |
| Jena Paradies        | NA    | 12,068 | 0.56            | 2             | 6.90          | 12.46         |
| Jena Paradies        | TU    | 5,294  | 0.13            | 0             | 10.98         | 12.46         |
| Jena Paradies        | DF    | 2,887  | 0.13            | 0             | 10.94         | 12.46         |
| Lichtenfels          | NA    | 14,750 | 0.90            | 1             | 9.60          | 15.25         |
| Lichtenfels          | TU    | 10,117 | 0.29            | 1             | 13.76         | 15.25         |
| Lichtenfels          | DF    | 2,016  | 0.29            | 0             | 14.34         | 15.25         |
| Erlangen             | NA    | 1,384  | 2.45            | 10            | 7.13          | 14.83         |
| Erlangen             | TU    | 21,091 | 0.18            | 6             | 14.29         | 15.28         |
| Erlangen             | DF    | 3,523  | 0.18            | 2             | 14.90         | 15.28         |
| Bamberg              | NA    | 972    | 0.89            | 6             | 4.95          | 12.97         |
| Bamberg              | TU    | 5,203  | 0.05            | 4             | 11.46         | 13.07         |
| Bamberg              | DF    | 1,496  | 0.05            | 1             | 12.69         | 13.08         |
| Aschaffenburg        | NA    | 6,233  | 0.02            | 5             | 11.51         | 12.95         |
| Aschaffenburg        | TU    | 1      | 0.01            | 2             | 12.54         | 12.95         |
| Aschaffenburg        | DF    | 1      | 0.01            | 1             | 12.40         | 12.95         |
| Kiel Hbf             | NA    | 3,440  | 0.07            | 2             | 4.20          | 11.20         |
| Kiel Hbf             | TU    | 1      | 0.01            | 2             | 10.54         | 11.19         |
| Kiel Hbf             | DF    | 1      | 0.01            | 0             | 10.84         | 11.20         |
| Leipzig Hbf (tief)   | NA    | 1      | 2.25            | 3             | 5.13          | 6.40          |
| Leipzig Hbf (tief)   | TU    | 1      | 0.69            | 3             | 5.13          | 6.40          |
| Leipzig Hbf (tief)   | DF    | 1      | 0.58            | 0             | 5.13          | 6.40          |
| Würzburg Hbf         | NA    | 1,840  | 0.60            | 16            | 0.97          | 7.85          |
| Würzburg Hbf         | TU    | 12,089 | 0.03            | 8             | 8.08          | 8.31          |
| Würzburg Hbf         | DF    | 34,801 | 0.02            | 3             | 8.00          | 8.32          |
| Dresden              | NA    | 1      | 0.82            | 123           | 6.35          | 8.81          |
| Dresden              | TU    | 21,596 | 0.06            | 30            | 8.48          | 9.29          |
| Dresden              | DF    | 5,330  | 0.05            | 3             | 8.48          | 9.30          |
| Ulm Hbf              | NA    | 26     | 0.02            | 26            | 5.95          | 11.22         |
| Ulm Hbf              | TU    | 1      | 0.01            | 7             | 10.77         | 11.23         |
| Ulm Hbf              | DF    | 1      | 0.01            | 3             | 11.03         | 11.23         |
| Stuttgart Hbf (tief) | NA    | 1      | 1.10            | 538           | 0.70          | 0.93          |
| Stuttgart Hbf (tief) | TU    | 75     | 0.13            | 121           | 0.66          | 0.93          |
| Stuttgart Hbf (tief) | DF    | 23     | 0.13            | 9             | 0.80          | 0.93          |
| Berlin Hbf (S-Bahn)  | NA    | 0      | 0.00            | 19            | 2.97          | 2.97          |
| Berlin Hbf (S-Bahn)  | TU    | 0      | 0.00            | 23            | 2.97          | 2.97          |
| Berlin Hbf (S-Bahn)  | DF    | 0      | 0.00            | 13            | 2.97          | 2.97          |
| Hamburg-Altona(S)    | NA    | 1      | 1.73            | 533           | 0.44          | 1.29          |
| Hamburg-Altona(S)    | TU    | 1      | 0.06            | 129           | 1.25          | 1.29          |
| Hamburg-Altona(S)    | DF    | 1      | 0.06            | 9             | 1.25          | 1.29          |
| Frankfurt(Main)Hbf   | NA    | 81     | 1.14            | 136           | 4.10          | 9.34          |
| Frankfurt(Main)Hbf   | TU    | 1,213  | 0.01            | 23            | 10.09         | 10.28         |
| Frankfurt(Main)Hbf   | DF    | 32     | 0.01            | 5             | 10.09         | 10.28         |
| Nürnberg             | NA    | 0      | -               | -             | -             | -             |
| Nürnberg             | TU    | 1      | 0.01            | 43            | 7.10          | 7.10          |
| Nürnberg             | DF    | 1      | 0.01            | 5             | 6.92          | 7.10          |

Table 1: Statistics on the solution process for the local instances for the different formulations of Problem (TTMAPBR). A dash ('-') indicates hitting the time limit of 10 minutes and no feasible solution and/or bound found.

| Instance        | Form. | #BB   | Root-IP gap [%] | Next sol. [s] | Next sav. [%] | Best sav. [%] |
|-----------------|-------|-------|-----------------|---------------|---------------|---------------|
| S-Bahn Hamburg  | NA    | 0     | 4.47            | -             | -             | -             |
| S-Bahn Hamburg  | TU    | 1     | 0.03            | 273           | 2.28          | 2.36          |
| S-Bahn Hamburg  | DF    | 1     | 0.04            | 18            | 2.27          | 2.36          |
| Regio Nord      | NA    | 1     | 0.12            | 68            | 10.94         | 12.79         |
| Regio Nord      | TU    | 1     | 0.01            | 20            | 12.78         | 12.79         |
| Regio Nord      | DF    | 1     | 0.01            | 7             | 12.43         | 12.79         |
| Regio Nordost   | NA    | 47    | 15.59           | -             | -             | -             |
| Regio Nordost   | TU    | 1     | 0.01            | 28            | 15.50         | 15.50         |
| Regio Nordost   | DF    | 1     | 0.01            | 9             | 15.39         | 15.50         |
| Regio Hessen    | NA    | 1     | 0.01            | 26            | 5.64          | 5.64          |
| Regio Hessen    | TU    | 1     | 0.01            | 31            | 5.12          | 5.65          |
| Regio Hessen    | DF    | 1     | 0.01            | 10            | 5.61          | 5.64          |
| Regio Südwest   | NA    | 1     | 0.06            | 85            | 12.98         | 13.00         |
| Regio Südwest   | TU    | 1     | 0.01            | 65            | 12.95         | 13.00         |
| Regio Südwest   | DF    | 1     | 0.01            | 10            | 12.88         | 13.00         |
| Regio Südost    | NA    | 5,930 | 8.96            | -             | -             | -             |
| Regio Südost    | TU    | 1     | 0.00            | 72            | 8.81          | 8.96          |
| Regio Südost    | DF    | 1     | 0.01            | 17            | 8.86          | 8.95          |
| Regio BW        | NA    | 0     | 14.30           | -             | -             | -             |
| Regio BW        | TU    | 1     | 0.01            | 286           | 13.09         | 13.35         |
| Regio BW        | DF    | 1     | 0.00            | 22            | 13.34         | 13.36         |
| S-Bahn Berlin   | NA    | 1     | 0.01            | 84            | 1.30          | 1.73          |
| S-Bahn Berlin   | TU    | 1     | 0.01            | 195           | 1.55          | 1.73          |
| S-Bahn Berlin   | DF    | 1     | 0.01            | 83            | 1.67          | 1.73          |
| Regio NRW       | NA    | 0     | -               | -             | -             | -             |
| Regio NRW       | TU    | 0     | -               | -             | -             | -             |
| Regio NRW       | DF    | 1     | 0.01            | 28            | 5.08          | 5.13          |
| Regio Bayern    | NA    | 1     | 0.21            | 513           | 10.65         | 10.73         |
| Regio Bayern    | TU    | 1     | 0.01            | 94            | 10.72         | 10.72         |
| Regio Bayern    | DF    | 1     | 0.01            | 41            | 10.60         | 10.72         |
| Fernverkehr     | NA    | 1     | 0.01            | 59            | 2.93          | 5.38          |
| Fernverkehr     | TU    | 1     | 0.01            | 17            | 5.38          | 5.38          |
| Fernverkehr     | DF    | 1     | 0.01            | 11            | 5.24          | 5.38          |
| Regionalverkehr | NA    | 0     | -               | -             | -             | -             |
| Regionalverkehr | TU    | 0     | -               | -             | -             | -             |
| Regionalverkehr | DF    | 0     | -               | -             | -             | -             |
| Deutschland     | NA    | 0     | 5.06            | -             | -             | -             |
| Deutschland     | TU    | 0     | -               | -             | -             | -             |
| Deutschland     | DF    | 1     | 0.01            | 481           | 5.02          | 5.05          |

Table 2: Statistics on the solution process for the regional and national instances for the different formulations of Problem (TTMAPBR). A dash ('-') indicates hitting the time limit of 10 minutes and no feasible solution and/or bound found.

Tables 3 and 4 give the same statistics as before for Problem (TTMAPI), comparing methods MIP and Benders over a time limit of 10 hours. The results can be seen as exemplary for (TTMAP) as well. We see that Benders can always produce the first improved solution faster than MIP, often by one or two orders of magnitude. For the local instances, Benders finds superior first improving solutions in addition. On the other hand, the first improving solution found by MIP for the regional instances is usually much better than the one found by Benders. For instances *Regionalverkehr* and *Deutschland*, we see that only Benders is able to produce an improving solution at all. In general, Benders can afford to solve many more branch-and-bound nodes within the time limit due to the reduced problem size. For the local instances, this leads to a better overall performance. For the regional instances, MIP takes a long time to solve the root LP relaxation, but then the information gained there is superior to that obtained by Benders, and better first improving solutions are found. However, for instances *Regionalverkehr*

and *Deutschland*, MIP cannot solve the root relaxation within 10 hours, while Benders performs much better. Altogether, the reduction of problem size by Benders enables us to find very good LP bounds and solutions early on, while after 10 hours the MIP is able to catch up on all but the largest two instances.

| Instance             | Method  | #BB        | Root-IP gap [%] | Next sol. [s] | Next sav. [%] | Best sav. [%] |
|----------------------|---------|------------|-----------------|---------------|---------------|---------------|
| Zeil                 | MIP     | 149        | 37.42           | 257           | 7.93          | 29.56         |
| Zeil                 | Benders | 1,076,763  | 29.98           | 2             | 13.96         | 40.85         |
| Bayreuth Hbf         | MIP     | 18,549     | 12.42           | 49            | 15.92         | 28.27         |
| Bayreuth Hbf         | Benders | 3,616,285  | 16.15           | 2             | 7.23          | 29.69         |
| Passau               | MIP     | 9,372      | 8.02            | 674           | 8.13          | 27.74         |
| Passau               | Benders | 966,406    | 9.71            | 18            | 10.02         | 28.29         |
| Jena Paradies        | MIP     | 41,932     | 0.41            | 307           | 12.17         | 15.23         |
| Jena Paradies        | Benders | 1,461,635  | 0.43            | 1             | 13.52         | 15.32         |
| Lichtenfels          | MIP     | 3,970      | 0.29            | 1,347         | 21.72         | 26.31         |
| Lichtenfels          | Benders | 37,287     | 0.49            | 1             | 18.91         | 26.31         |
| Erlangen             | MIP     | 4,746      | 0.37            | 1,552         | 21.90         | 25.98         |
| Erlangen             | Benders | 1,337,382  | 0.50            | 6             | 22.32         | 25.98         |
| Bamberg              | MIP     | 42,640     | 0.15            | 2,857         | 18.26         | 20.84         |
| Bamberg              | Benders | 1,356,763  | 0.22            | 4             | 17.23         | 20.85         |
| Aschaffenburg        | MIP     | 22,916     | 0.15            | 5,710         | 13.01         | 15.85         |
| Aschaffenburg        | Benders | 2,115,654  | 0.17            | 11            | 13.91         | 15.90         |
| Kiel Hbf             | MIP     | 23,397     | 0.63            | 2,772         | 14.12         | 24.07         |
| Kiel Hbf             | Benders | 3,112,494  | 0.57            | 8             | 21.01         | 24.24         |
| Leipzig Hbf (tief)   | MIP     | 6,422      | 1.08            | 169           | 10.77         | 20.12         |
| Leipzig Hbf (tief)   | Benders | 34,916,658 | 3.04            | 5             | 5.71          | 20.12         |
| Würzburg Hbf         | MIP     | 13,659     | 0.22            | 8,174         | 15.83         | 18.33         |
| Würzburg Hbf         | Benders | 1,283,635  | 0.24            | 15            | 17.09         | 18.37         |
| Dresden              | MIP     | 5,780      | 0.59            | 11,717        | 18.79         | 22.64         |
| Dresden              | Benders | 556,324    | 0.84            | 33            | 12.19         | 22.80         |
| Ulm Hbf              | MIP     | 7,687      | 0.15            | 15,153        | 13.30         | 17.45         |
| Ulm Hbf              | Benders | 1,264,683  | 0.13            | 11            | 14.13         | 17.52         |
| Stuttgart Hbf (tief) | MIP     | 363        | 2.00            | 596           | 7.48          | 9.88          |
| Stuttgart Hbf (tief) | Benders | 37         | 3.05            | 18            | 6.54          | 9.88          |
| Berlin Hbf (S-Bahn)  | MIP     | 15,272     | 0.42            | 103           | 7.74          | 9.30          |
| Berlin Hbf (S-Bahn)  | Benders | 22,488,370 | 4.50            | 20            | 2.10          | 9.30          |
| Hamburg-Altona(S)    | MIP     | 3,811      | 5.61            | 631           | 4.39          | 10.99         |
| Hamburg-Altona(S)    | Benders | 1,461,544  | 9.80            | 19            | 3.32          | 10.99         |
| Frankfurt(Main)Hbf   | MIP     | 4,034      | 0.01            | 2,600         | 15.13         | 15.46         |
| Frankfurt(Main)Hbf   | Benders | 6,230      | 0.01            | 30            | 15.43         | 15.46         |
| Nürnberg             | MIP     | 23,062     | 0.04            | 3,696         | 13.18         | 14.21         |
| Nürnberg             | Benders | 394,527    | 0.03            | 31            | 13.49         | 14.22         |

Table 3: Statistics on the solution process for the regional and national instances for the different formulations of Problem (TTMAP) over a time limit of 10 hours

| Instance        | Method  | #BB       | Root-IP gap [%] | Next sol. [s] | Next sav. [%] | Best sav. [%] |
|-----------------|---------|-----------|-----------------|---------------|---------------|---------------|
| S-Bahn Hamburg  | MIP     | 1,428     | 3.63            | 1,321         | 10.30         | 13.70         |
| S-Bahn Hamburg  | Benders | 71,830    | 7.51            | 63            | 11.01         | 13.70         |
| Regio Nord      | MIP     | 5,854     | 0.31            | 5,262         | 11.95         | 14.27         |
| Regio Nord      | Benders | 260,334   | 2.98            | 283           | 0.06          | 14.04         |
| Regio Nordost   | MIP     | 5,863     | 0.36            | 7,093         | 28.17         | 28.47         |
| Regio Nordost   | Benders | 91,600    | 2.87            | 357           | 0.83          | 28.06         |
| Regio Hessen    | MIP     | 23,000    | 0.20            | 1,789         | 13.86         | 16.52         |
| Regio Hessen    | Benders | 358,009   | 1.94            | 85            | 5.11          | 16.44         |
| Regio Südwest   | MIP     | 5,451     | 0.19            | 6,944         | 14.38         | 16.57         |
| Regio Südwest   | Benders | 22,069    | 3.13            | 663           | 2.78          | 16.10         |
| Regio Südost    | MIP     | 1,045     | 0.22            | 10,081        | 23.99         | 24.87         |
| Regio Südost    | Benders | 18,994    | 1.71            | 362           | 5.22          | 24.59         |
| Regio BW        | MIP     | 5         | 0.61            | 10,854        | 19.71         | 21.91         |
| Regio BW        | Benders | 9,693     | 1.40            | 191           | 5.64          | 21.91         |
| S-Bahn Berlin   | MIP     | 75,450    | 0.12            | 1,192         | 4.46          | 5.07          |
| S-Bahn Berlin   | Benders | 1,077,974 | 8.31            | 192           | 1.13          | 5.04          |
| Regio NRW       | MIP     | 5,972     | 0.29            | 9,786         | 14.14         | 18.18         |
| Regio NRW       | Benders | 340,403   | 1.06            | 178           | 1.98          | 18.08         |
| Regio Bayern    | MIP     | 3,540     | 0.08            | 13,456        | 20.88         | 21.66         |
| Regio Bayern    | Benders | 44,497    | 1.68            | 147           | 4.63          | 21.66         |
| Fernverkehr     | MIP     | 5,914     | 0.02            | 11,572        | 9.61          | 10.23         |
| Fernverkehr     | Benders | 31,656    | 0.01            | 118           | 10.22         | 10.24         |
| Regionalverkehr | MIP     | 0         | -               | -             | -             | -             |
| Regionalverkehr | Benders | 5,803     | 3.28            | 6,504         | 3.66          | 15.37         |
| Deutschland     | MIP     | 0         | -               | -             | -             | -             |
| Deutschland     | Benders | 1         | 0.09            | 3,082         | 4.22          | 9.32          |

Table 4: Statistics on the solution process for the regional and national instances for the different formulations of Problem (TTMAP). A dash (‘-’) indicates hitting the time limit of 10 hours and no feasible solution and/or bound found.

For instance *Deutschland*, we finally present an additional study with different values for the allowable upper bound on instantaneous peak power consumption, see Table 5. Here, we took the largest power consumption in any second of the planning horizon, which was 774.42 MW, and multiplied it by different factors (see Column *Factor*) to obtain the value for  $U$ . The resulting maximally allowed instantaneous power consumption is shown in Column *Max U*. In Column *Max U solution*, we compare it to the maximum instantaneous power consumption actually occurring in the resulting solution. Column *Savings* shows the achieved reduction in maximum average peak consumption compared to the initial timetable, and Column *Time* shows the solution time needed by Benders. It becomes clear that it is possible to reduce the maximum instantaneous power consumption significantly while only losing little in the savings with respect to maximum average power consumption. We also see that with smaller values for  $U$ , it becomes more difficult to solve the resulting instances. Our experiments show that it becomes increasingly difficult to find a first feasible solution, which is to be expected, as the search space shrinks considerably. We suspect that for even smaller factors than 0.87, the problem is infeasible.

Figure 1 shows that, indeed, both aims of reducing maximum peak consumption and instantaneous consumption can be realized in Germany-wide railway traffic. The depicted solution reduces the former by 9.16% and the latter by 13%.

| Instance    | Factor   | Max $U$ [MW] | Max. $U$ solution [MW] | Savings [%] | Time [s] |
|-------------|----------|--------------|------------------------|-------------|----------|
| Deutschland | 0.87     | 673.75       | 673.71                 | 9.16        | 19,339   |
| Deutschland | 0.88     | 681.49       | 681.46                 | 9.18        | 15,593   |
| Deutschland | 0.90     | 696.98       | 696.97                 | 9.22        | 12,627   |
| Deutschland | 1.00     | 774.42       | 774.39                 | 9.32        | 5,132    |
| Deutschland | 1.10     | 851.87       | 851.75                 | 9.36        | 4,216    |
| Deutschland | 1.20     | 929.31       | 928.95                 | 9.38        | 3,679    |
| Deutschland | no limit | -            | 1,001.91               | 9.38        | 3,483    |

Table 5: Statistics for the solutions of Problem (TTMAPI) for instance *Deutschland* for different values of  $U$  using Benders decomposition.

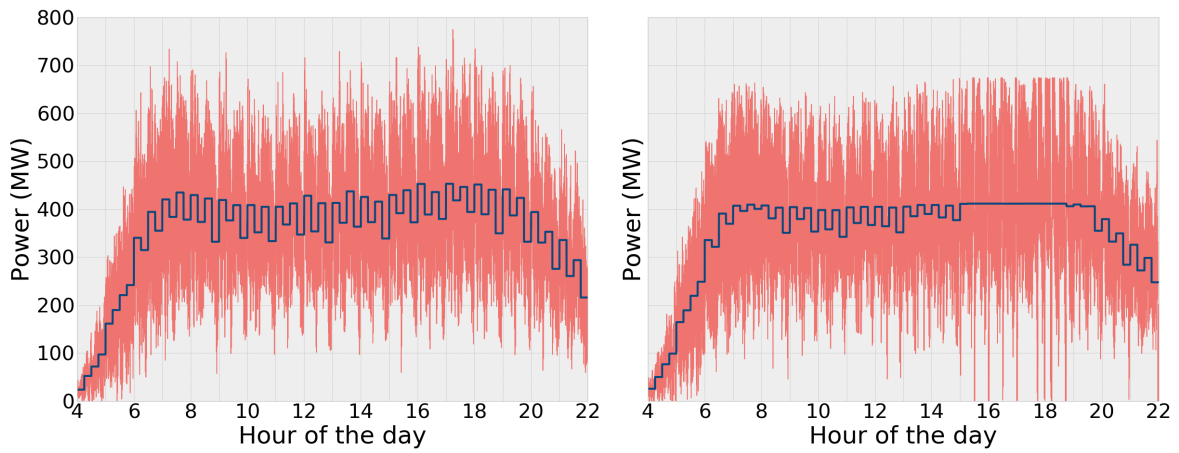

Figure 1: Power consumption profile of instance *Deutschland* before (left) and after (right) optimization according to (TTMAPI) with a peak reduction factor of 0.87 after 10 hours of computation via Benders decomposition
